# Supplementary material
Source: PubMed Central journal article supplement (PMC10496787)
Supplement: NIHMS1922422-supplement-id-2016-000067_SI.pdf [file NIHMS1922422-supplement-id-2016-000067_SI.pdf]

# **Immunodominant SARS Coronavirus Epitopes in Humans Elicited both Enhancing and Neutralizing Effects on Infection in Non-Human Primates**

Qidi Wang<sup>#,2</sup>, Lianfeng Zhang<sup>#,3</sup>, Kazuhiko Kuwahara<sup>#,4</sup>, Li Li<sup>2</sup>, Taisheng Li<sup>5</sup>, Hua Zhu<sup>3</sup>, Jiangning Liu<sup>3</sup>, Yanfeng Xu<sup>3</sup>, Jing Xie<sup>5</sup>, Hiroshi Morioka<sup>4</sup>, Nobuo Sakaguchi<sup>\*,4,6</sup>, Chuan Qin<sup>\*,3</sup>, Gang LIU<sup>\*,1,2</sup>

1. Tsinghua-Peking Center for Life Sciences & School of Pharmaceutical Sciences, Tsinghua University, Haidian Dist., Beijing 100084, P. R. China.

2. Institute of Materia Medica, Chinese Academy of Medical Sciences & Peking Union Medical College, 2A Nanwei Rd., Xuanwu Dist, Beijing 100050, P. R. China.

3. Institute of Laboratory Animal Science, Chinese Academy of Medical Sciences and Peking Union Medical College, Beijing, 100021, P. R. China.

4. Faculty of Life Sciences, Kumamoto University, 1-1-1, Honjo, Kumamoto 860-8556, Japan.

5. Department of Infectious Disease, Peking Union Medical College Hospital and AIDS Research Center, Chinese Academy of Medical Sciences and Peking Union Medical College, Beijing, 100071, P. R. China.

6. WPI Immunology Frontier Research Center, Osaka University, 3-1 Yamada-oka, Suita, Osaka, 565-0871, Japan.

# These authors equally contribute to this study.

\* To whom correspondence should be addressed. [nobusaka@ifrec.osaka-u.ac.jp](mailto:nobusaka@ifrec.osaka-u.ac.jp), [qinchuan@pumc.edu.cn](mailto:qinchuan@pumc.edu.cn), or [gangliu27@tsinghua.edu.cn](mailto:gangliu27@tsinghua.edu.cn)

## Supplements

**Table S1.** Neutralization and enhancement of SARS-CoV infection of Vero E6 cells in the presence of human antisera of convalescent SARS patients\*

| #Enhancement of SARS-CoV infection |                  |              |                 |              |                 | #Blockage of SARS-CoV infection |                |
|------------------------------------|------------------|--------------|-----------------|--------------|-----------------|---------------------------------|----------------|
| SARS patient                       |                  | SARS patient |                 | SARS patient |                 | SARS patient                    |                |
| code                               | Neutralization   | code         | Neutralization  | Code         | Neutralization  | code                            | Neutralization |
| W1                                 | -117.00% ± 13.73 | W49          | -53.00% ± 11.14 | S204         | -58.00% ± 9.98  | W33                             | 29.00% ± 6.28  |
| W9                                 | -92.00% ± 10.15  | W61          | -49.00% ± 16.08 | S101         | -91.00% ± 8.50  | W29                             | 48.00% ± 6.00  |
| W35                                | -100.00% ± 11.56 | W53          | -53.00% ± 8.91  | S245         | -46.00% ± 7.69  | W73                             | 50.00% ± 7.77  |
| W38                                | -65.00% ± 8.41   | S102         | -43.00% ± 1.95  | S98          | -62.00% ± 12.58 | S100                            | 25.00% ± 11.92 |
| W41                                | -48.00% ± 9.82   | S196         | -46.00% ± 10.29 |              |                 | 3E7                             | 36.00% ± 2.27  |
| W45                                | -42.00% ± 10.92  | S241         | -50.00% ± 9.35  |              |                 | 1G4                             | 56.00% ± 0.77  |

\*Total 116 antisera (1:500 dilution) were tested in the neutral red staining(NRS) assay.

#For neutralization, six antisera with > 20% inhibition were defined as significantly blocking SARS-CoV infection; for enhancement, 17 antisera with > 40% augmentation were defined as significantly enhancing SARS-CoV infection.

**Table S2** Design and synthesized new peptides

---

**Novel peptides from the Spike glycoprotein**

---

S11–38: TSGSDLRCTTFDDVQAPNYTQHTSSMR

S119–132: NSTNVVIRACNFEL

S138–158: FAVSKPMGTQHTMIFDNAFN

S159–184: CTFEYISDAFSLDVSEKSGNFKHLRE

S162–180: EYISDAFSLDVSEKSGNFK

S188–211: KNKDGFLYVYKGYQPIDVVRDLPSG

S342–368: RKKISNCVADYSVLYNSTFFSTFKCYG (Disulfide)

S391–404: GDDVRQIAPGGTGV

S416–434: FMGCVLAWNTRNIDATSTG

S436–459: YNYKYRYLRHGKLRPFERDISNVP

S471–490: ALNCYWPLNDYGFYTTTGIG

S491–502: YQPYRVVVLSE

S522–535: NQCVNFNFNGLTGT

S597–625: LYQDVNCTDVSTAIHADQLTPAWRIYSTG

S679–695: MSLGADSSIAYSNNTIA

S686–713: SIAYSNNTIAIPTNFSISITTEVMPVSM

S803–828: LLFNKVTLADAGFMKQYGECLGDINA

S946–960: KQLSSNFGAISSVLN

S965–986: RLDKVEAEVQIDRLITGRLQSL

S993–1012: QLIRAAEIRASANLAATKM

S1084–1110: WFITQRNFFSPQIITTD

S1138–1154: FKNHTSPDVDLGDIG

S1155–1178: NASVVNIQKEIDRLNEVAKNLNE

---

**Table S3.** Generated anti-peptide mAbs \* NF=not functional.

| No. | Clone no.            | Isotype | Function* | Binding affinity to the peptide |          |
|-----|----------------------|---------|-----------|---------------------------------|----------|
| 1   | S <sub>471-503</sub> | 2F7     | IgG1 κ    | NF                              | 1.10E-09 |
| 2   |                      | 3E10    | IgG1 κ    | NF                              | 2.95E-09 |
| 3   |                      | 4E5     | IgG1 κ    | Neutralizing                    | 4.67E-09 |
| 4   |                      | 4A10    | IgG1 κ    | Neutralizing                    | 2.96E-09 |
| 5   |                      | 6G5     | IgG2b κ   | Neutralizing                    | 5.82E-09 |
| 6   |                      | 6A10    | IgG1 κ    | NF                              | 7.57E-09 |
| 7   |                      | 9A6     | IgG1 κ    | NF                              | 4.94E-09 |
| 8   | S <sub>604-625</sub> | 2B4     | IgG1 κ    | NF                              | 4.75E-06 |
| 9   |                      | 3B10    | IgG1 κ    | NF                              | 2.17E-07 |
| 10  |                      | 4H11    | IgG1 κ    | NF                              | 1.68E-08 |
| 11  |                      | 9A6     | IgG1 κ    | NF                              | 2.62E-09 |
| 12  |                      | 3A2     | IgG2a κ   | NF                              | 8.16E-09 |

|    |                        |           |       |   |              |          |
|----|------------------------|-----------|-------|---|--------------|----------|
| 13 |                        | 11B1      | IgG2a | κ | Neutralizing | 2.32E-09 |
| 14 |                        | 11B3      | IgG2a | κ | NF           | 6.94E-08 |
| 15 |                        | 14F1      | IgG2b | κ | NF           | 1.58E-06 |
| 16 |                        | 6D5       | IgG1  | κ | NF           | 8.77E-09 |
| 17 | S <sub>597-625</sub>   | 37-9-5    | IgG1  | κ | NF           | 3.94E-10 |
| 18 |                        | 43-3-14   | IgG1  | κ | Enhancing    | 1.21E-11 |
| 19 |                        | 65-5-10   | IgG1  | κ | NF           | 2.21E-10 |
| 20 |                        | 219-10-28 | IgG1  | κ | Enhancing    | 1.20E-08 |
| 21 | S <sub>1164-1191</sub> | 126-10    | IgG1  | κ | Neutralizing | 4.59E-9  |
| 22 |                        | 581-39    | IgG1  | κ | NF           | 1.56E-9  |
| 23 |                        | 608-25    | IgG1  | κ | NF           | 1.68E-9  |

**Table S4** Alanine walking peptides

---

L597A: AYQDVNCTDVSTAIHADQLTPAWRIYSTG

Y598A: LAQDVNCTDVSTAIHADQLTPAWRIYSTG

Q599A: LYADVNCTDVSTAIHADQLTPAWRIYSTG

D600A: LYQAVNCTDVSTAIHADQLTPAWRIYSTG

V601A: LYQDANCTDVSTAIHADQLTPAWRIYSTG

N602A: LYQDVACTDVSTAIHADQLTPAWRIYSTG

C603A: LYQDVNATDVSTAIHADQLTPAWRIYSTG

T604A: LYQDVNCADVSTAIHADQLTPAWRIYSTG

D605A: LYQDVNCTAVSTAIHADQLTPAWRIYSTG

V606A: LYQDVNCTDASTAIHADQLTPAWRIYSTG

---

**mAb43-3-14 specifically binding short peptides**

---

Leu-6-Asn(S597–602): LYQDVN

Leu-7-Cys(S597–603): LYQDVNC

Leu-8-Thr(S597–604): LYQDVNCT

---



**Table S5** Monkeys for peptide vaccine immunization against SARS-CoV

| <b>Vac1 (Control group)</b> |               |                                 | <b>Vac2<br/>(MAP-S<sub>597-625</sub> formulated with<br/>FCA/IFA)</b> |               |                                 | <b>Vac3<br/>(MAP-S<sub>471-503</sub>, MAP-S<sub>604-625</sub>,<br/>MAP-S<sub>1164-1191</sub> formulated with<br/>FCA/IFA)</b> |               |                                 | <b>Vac4<br/>(MAP-S<sub>471-503</sub>,<br/>MAP-S<sub>597-625</sub>,<br/>MAP-S<sub>1164-1191</sub> formulated<br/>with FCA/IFA)</b> |               |                                 |
|-----------------------------|---------------|---------------------------------|-----------------------------------------------------------------------|---------------|---------------------------------|-------------------------------------------------------------------------------------------------------------------------------|---------------|---------------------------------|-----------------------------------------------------------------------------------------------------------------------------------|---------------|---------------------------------|
| <b>Animal<br/>code</b>      | <b>Gender</b> | <b>Body<br/>Weight<br/>(kg)</b> | <b>Animal<br/>code</b>                                                | <b>Gender</b> | <b>Body<br/>weight<br/>(kg)</b> | <b>Animal<br/>Code</b>                                                                                                        | <b>Gender</b> | <b>Body<br/>weight<br/>(kg)</b> | <b>Animal<br/>code</b>                                                                                                            | <b>Gender</b> | <b>Body<br/>weight<br/>(kg)</b> |
| 041870<br>(A1)              | F             | 5.2                             | 040888<br>(B1)                                                        | F             | 5.6                             | 041057<br>(C1)                                                                                                                | M             | 6.1                             | 041642<br>(D1)                                                                                                                    | F             | 4.6                             |
| 031860<br>(A2)              | F             | 4.8                             | 040390<br>(B2)                                                        | F             | 5.2                             | 030874<br>(C2)                                                                                                                | F             | 5.5                             | 030177<br>(D2)                                                                                                                    | M             | 5.4                             |
| 040995<br>(A3)              | M             | 6.0                             | 040085<br>(B3)                                                        | M             | 6.5                             | 040203<br>(C3)                                                                                                                | M             | 5.1                             | 041399<br>(D3)                                                                                                                    | M             | 4.8                             |
| 041911<br>(A4)              | M             | 4.3                             | 031519<br>(B4)                                                        | M             | 5.0                             | 031632<br>(C4)                                                                                                                | F             | 6.2                             | 041902<br>(D4)                                                                                                                    | F             | 6.1                             |

|  |                      |                      |                      |
|--|----------------------|----------------------|----------------------|
|  | 040669 M 5.5<br>(B5) | 041811 M 5.1<br>(C5) | 041659 M 4.5<br>(D5) |
|  | 040830 F 4.8<br>(B6) | 041962 F 4.5<br>(C6) | 041326 F 6.0<br>(D6) |

**Table S6** Vaccinated animals sacrificed at 2 DPI

| <b>Vac1</b>        |               | <b>Vac2</b>        |               | <b>Vac3</b>        |               | <b>Vac4</b>        |               |
|--------------------|---------------|--------------------|---------------|--------------------|---------------|--------------------|---------------|
| <b>Animal code</b> | <b>Gender</b> |
| 041870<br>(A1)     | F             | 040888<br>(B1)     | F             | 041057<br>(C1)     | M             | 041642<br>(D1)     | F             |
| 031860<br>(A2)     | F             | 040390<br>(B2)     | F             | 030874<br>(C2)     | F             | 030177<br>(D2)     | M             |
|                    |               | 040085<br>(B3)     | M             | 040203<br>(C3)     | M             | 041399<br>(D3)     | M             |

**Table S7** Vaccinated animals sacrificed at 6 DPI

| <b>Vac1</b>        |               | <b>Vac2</b>        |               | <b>Vac3</b>        |               | <b>Vac4</b>        |               |
|--------------------|---------------|--------------------|---------------|--------------------|---------------|--------------------|---------------|
| <b>Animal code</b> | <b>Gender</b> |
| 040995<br>(A3)     | M             | 041519<br>(B4)     | M             | 031632<br>(C4)     | F             | 041902<br>(D4)     | F             |
| 041911<br>(A4)     | M             | 040669             | M             | 041811             | M             | 041659             | M             |

|  |  |                |   |                |   |                |   |
|--|--|----------------|---|----------------|---|----------------|---|
|  |  | (B5)           |   | (C5)           |   | (D5)           |   |
|  |  | 040830<br>(B6) | F | 041962<br>(C6) | F | 041326<br>(D6) | F |

**Table S8** Pathologic classification of the severity of the lung damage in SARS-CoV-infected rhesus macaques

| <b>Grade</b> | <b>Pathologic classification of the severity of the lung damage in SARS-CoV-infected rhesus macaques</b>                                                                                                                                                                                                                                        |
|--------------|-------------------------------------------------------------------------------------------------------------------------------------------------------------------------------------------------------------------------------------------------------------------------------------------------------------------------------------------------|
| –            | normal macaque lung section without SARS-CoV infection                                                                                                                                                                                                                                                                                          |
| ±            | minor inflammation, slight alveolar septal broadening and sparse monocyte infiltration                                                                                                                                                                                                                                                          |
| <b>I</b>     | apparent inflammation, hemorrhage in septa, elastic fibers of alveolar wall distorted as shown by silver staining                                                                                                                                                                                                                               |
| <b>II</b>    | early symptoms of acute diffuse alveolar damage (DAD), alveolar septal broadening with increasing infiltration of inflammatory cells                                                                                                                                                                                                            |
| <b>III</b>   | typical symptoms of acute DAD, extensive exudation and septal broadening, shrinkage of alveoli caused by pressure, restricted fusion of thick septa, ruptured elastic fibers of alveoli, variably filled with protein-rich edema fluid, fibrin, erythrocytes, cellular debris, and a moderate number of inflammatory cells in alveolar cavities |
| <b>IV</b>    | severe acute DAD, massive cell infiltration and alveolar shrinking, sheets of septal fusion, necrotic lesions at the hemorrhagic septa and massive cell numbers in alveolar cavities                                                                                                                                                            |

**Table S9** Monkeys treated by mAb43-3-14 were sacrificed at 2 DPI or 6 DPI

|       | Control group(0.9% NaCl) |             |                 | 0.2mg/kg group |             |                 | 1.8mg/kg group |             |                 |
|-------|--------------------------|-------------|-----------------|----------------|-------------|-----------------|----------------|-------------|-----------------|
|       | Group                    | Animal code | Body weight(kg) | Group          | Animal code | Body weight(kg) | Group          | Animal code | Body weight(kg) |
| 2 DPI | A1                       | 061920      | 3.3             | B1             | 041986      | 4.2             | D1             | 051848      | 3.85            |
|       | A2                       | 050426      | 4.1             | B2             | 040654      | 3.8             | D2             | 051976      | 3.9             |
|       | A3                       | 051926      | 3.6             | B3             | 060512      | 3.15            | D3             | 060578      | 3.3             |
| 6 DPI | A4                       | 060090      | 3.5             | B4             | 051192      | 4.1             | D4             | 060060      | 3.7             |
|       | A5                       | 051804      | 3.9             | B5             | 051820      | 3.6             | D5             | 040478      | 3.8             |
|       | A6                       | 050104      | 4.0             | B6             | 051282      | 3.8             | D6             | 051144      | 4.1             |

**Table S10** The conditions for preparation of multiple antigen peptides

| MAP\Conditions           | Lysine<br>core/peptide<br>amount               | Reaction<br>solvent                                    | Reaction<br>pH/Reaction<br>time                                         | Reaction<br>monitoring<br>gradient                                                   | Preparation<br>condition                                                                                     | Molecular<br>weight<br>(Da,<br>calculated/<br>observed) | Amount<br>(Yield) | Purity |
|--------------------------|------------------------------------------------|--------------------------------------------------------|-------------------------------------------------------------------------|--------------------------------------------------------------------------------------|--------------------------------------------------------------------------------------------------------------|---------------------------------------------------------|-------------------|--------|
| MAP-S <sub>604-625</sub> | 0.4 mg (0.42<br>mmol)/5.1<br>mg (2.00<br>mmol) | CH <sub>3</sub> CN/H <sub>2</sub><br>O (25/75,<br>v/v) | 7.8 (saturated<br>Na <sub>2</sub> CO <sub>3</sub><br>adjusting), 2<br>h | 0–25%<br>CH <sub>3</sub> CN for 8<br>min, 25–45%<br>CH <sub>3</sub> CN for<br>50 min | Vydac<br>(208TP510),<br>0–25%<br>CH <sub>3</sub> CN for 5<br>min, 25–40%<br>CH <sub>3</sub> CN for<br>50 min | 10655.83/1<br>0656.1072                                 | 2.1 mg (40%)      | 98%    |
| MAP-S <sub>597-625</sub> | 0.35 mg<br>(0.37<br>mmol)/5.0<br>mg (1.54      | CH <sub>3</sub> CN/H <sub>2</sub><br>O (50/50,<br>v/v) | 8.5 (saturated<br>Na <sub>2</sub> CO <sub>3</sub><br>adjusting), 5<br>h | 0–25%<br>CH <sub>3</sub> CN for 8<br>min, 25–45%<br>CH <sub>3</sub> CN for           | Vydac<br>(214TP1022)<br>, 0–25%<br>CH <sub>3</sub> CN for 5                                                  | 13581.83/1<br>3587.2338                                 | 2.5 mg (50%)      | 95%    |

|                                  |                                                    |                                                                     |                                                                                                          |                                                                                      |                                                                                                               |                         |              |     |
|----------------------------------|----------------------------------------------------|---------------------------------------------------------------------|----------------------------------------------------------------------------------------------------------|--------------------------------------------------------------------------------------|---------------------------------------------------------------------------------------------------------------|-------------------------|--------------|-----|
|                                  | mmol)                                              |                                                                     |                                                                                                          | 50 min                                                                               | min, 25–40%<br>CH <sub>3</sub> CN for<br>50 min                                                               |                         |              |     |
| <i>MAP-S<sub>471-503</sub></i>   | 0.30 mg<br>(0.31<br>mmol)/5.0<br>mg (1.29<br>mmol) | CH <sub>3</sub> CN/H <sub>2</sub><br>O/DMSO<br>(40/50/10,<br>v/v/v) | 8.5 (saturated<br>Na <sub>2</sub> CO <sub>3</sub><br>adjusting),<br>overnight, or<br>ultrasonicatio<br>n | 0–40%<br>CH <sub>3</sub> CN for 8<br>min, 40–55%<br>CH <sub>3</sub> CN for<br>50 min | Vydac<br>(214TP1022),<br>0–25%<br>CH <sub>3</sub> CN for 5<br>min, 25–40%<br>CH <sub>3</sub> CN for<br>50 min | 16084.23/1<br>6091.4292 | 1.5 mg (30%) | 96% |
| <i>MAP-S<sub>1164-1191</sub></i> | 0.35 mg<br>(0.37<br>mmol)/5.0<br>mg (1.54<br>mmol) | CH <sub>3</sub> CN/H <sub>2</sub><br>O<br>(25/75, v/v)              | 7.8 (saturated<br>Na <sub>2</sub> CO <sub>3</sub><br>adjusting), 2<br>h                                  | 0–25%<br>CH <sub>3</sub> CN for 8<br>min, 25–45%<br>CH <sub>3</sub> CN for<br>50 min | Vydac<br>(208TP510),<br>0–35%<br>CH <sub>3</sub> CN for 5<br>min, 35–45%<br>CH <sub>3</sub> CN for<br>50 min  | 14389.03/1<br>4392.1516 | 2.1 mg (42%) | 98% |

Chart S1. The protocol of immunization of rhesus monkeys

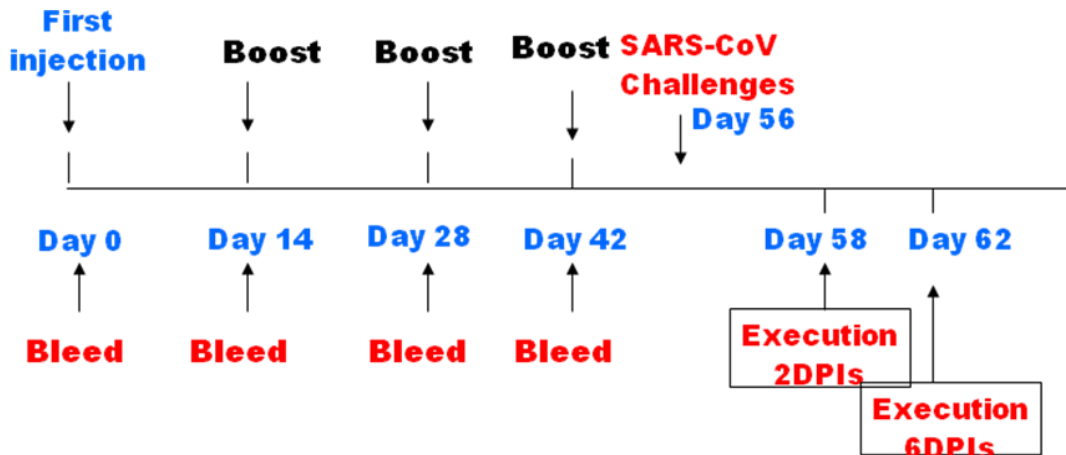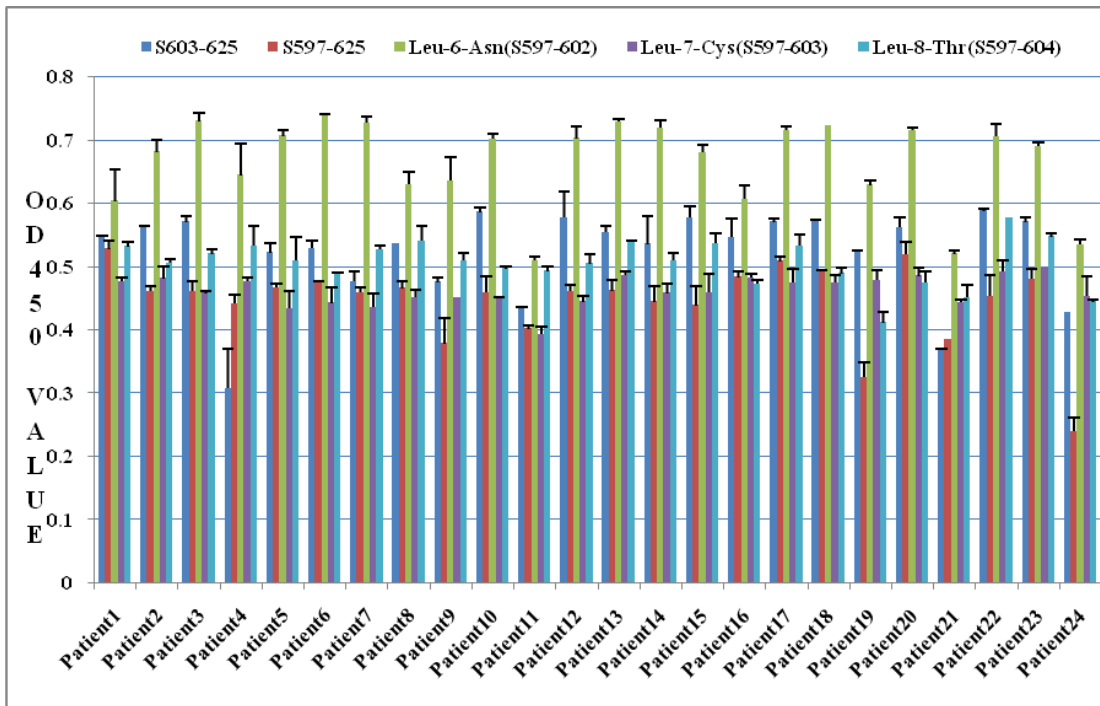

Fig. S1 The serologic reactivity of peptides with the human IgG of convalescent SARS patients.



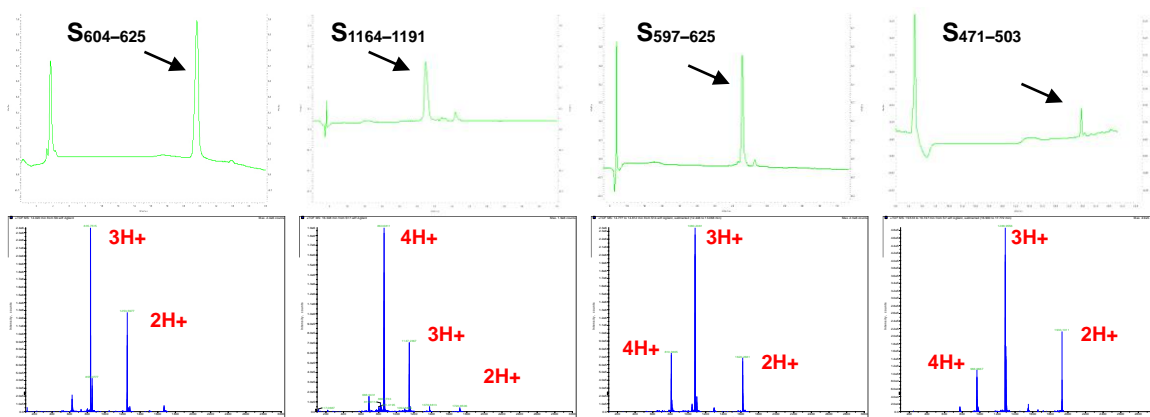

**Fig. S2** Characterization of S<sub>604-625</sub>, S<sub>1164-1191</sub>, S<sub>597-625</sub> and S<sub>471-503</sub>. RP-HPLC profiles and MS data.

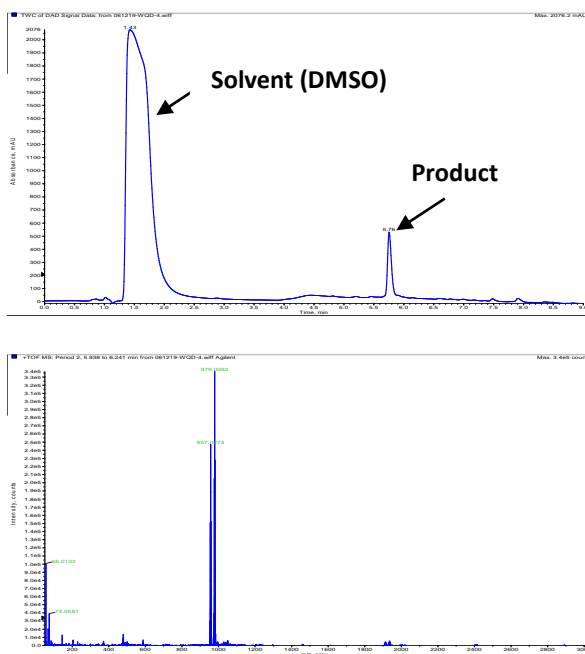

**Fig. S3** Characterization of lysine core by RP-HPLC analysis and mass spectrum.

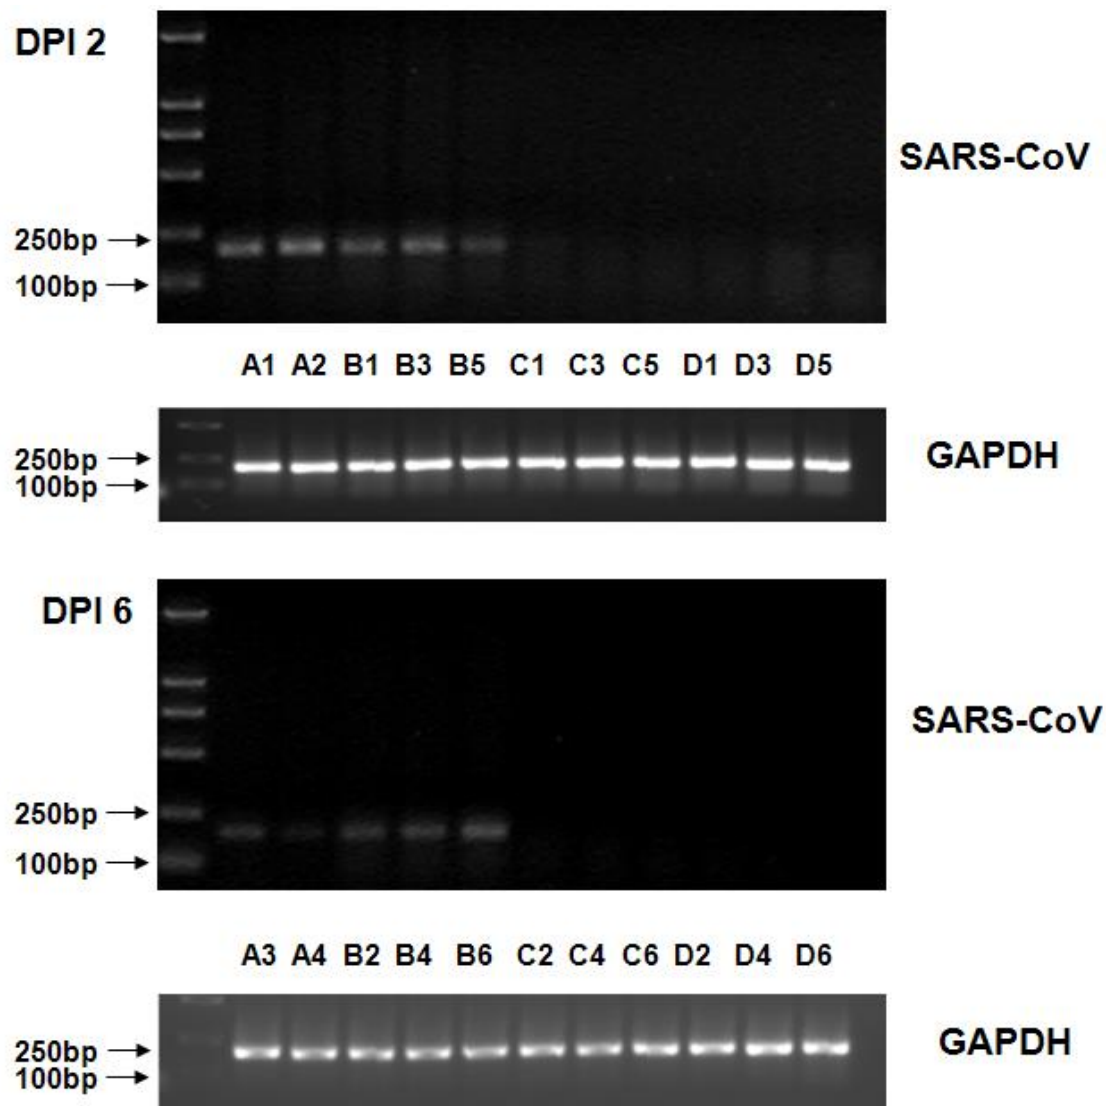

**Fig. S4** Lung tissue viral burden analyzed by RT-PCR (A1-A4: Vac1 group, B1-B6: Vac 2 group, C1-C6: Vac 3 group, D1-D6: Vac 4 group)

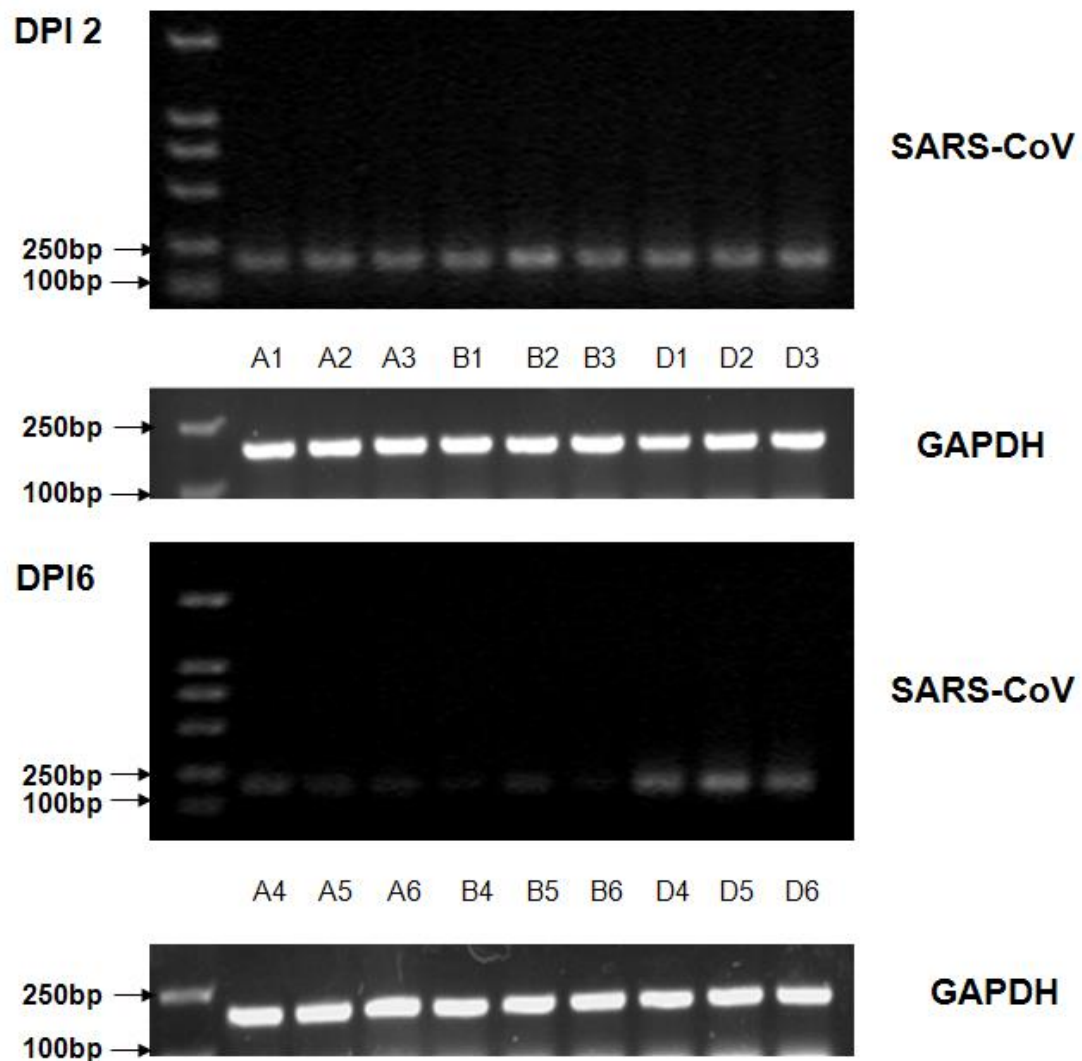

**Fig. S5** Lung tissue viral burden analyzed by RT-PCR (A1-A6: 0.9% NaCl group, B1-B6: 0.2mg/kg group, C1-C6: 1.8mg/kg group)
